# Supplementary material
Source: PubMed Central journal article supplement (PMC2657934)

## Supplemental Methods

**Antibodies.** The following antibodies were used in the supplementary figures: phosphoS473-AKT (44621G) from Biosource Inter. (Camarillo, CA); total AKT (610860) from BD Biosciences (San Jose, CA); vinculin (V4505) from Sigma-Aldrich (St. Louis, MO); cyclin D1 (sc718), B-RAF (sc5284) and p53 (sc126) from Santa Cruz Biotech;  $\alpha$ v $\beta$ 3 (LM609),  $\beta$ 1 (P4C10),  $\alpha$ 1 (FB12) and  $\alpha$ 2 (P1E6) integrin antibodies from Millipore.

**shRNA sequences.** The following oligonucleotide sequences were used for shRNAs.

Control: 5'-

CACCGTAGCGACTAAACACATCAATTCAAGAGATTGATGTGTTTAGTCGCTA and 5'-AAAATAGCGACTAAACACATCAATTCTCTTGAATTGATGTGTTTAGTCGCTAC.

Rnd3<sup>#1</sup>:

5'-CACCGCTACAGTGTTTGAGAATTATTCAAGAGATAATTCTCAAACACTGTAG and 5'-AAAACACTACAGTGTTTGAGAATTATTCTCTTGAATAATTCTCAAACACTGTAGC

Rnd3<sup>#2</sup>:

5'-CACCGCGGACAGATGTTAGTACATTCAAGAGATGTACTAACATCTGTCCGC and 5'-AAAAGCGGACAGATGTTAGTACATTCTCTTGAATGTACTAACATCTGTCCGC. The

underlined bases signify the hairpin.

**Collagen gel adhesion.** Cell adhesion was performed using WM793TR Ctl and Rnd3 shRNA cells after being treated +/- dox for 3 days. An equal number of cells were resuspended and plated onto a layer of bovine collagen I gel for increasing times (5, 15, 30, 60 and 90 min). Gels were washed with PBS and fixed with 3.7% paraformaldehyde. The number of cells occupying six different fields viewed by x20 magnification using an Olympus IX-70 inverted

microscope was counted. Experiments were performed in triplicate wells and reproduced in three independent experiments.

## Supplemental Figure Legends

**Supplementary Figure 1.** Endogenous Rnd3 regulates alterations in F-actin organization in melanoma. *A*, Examples of WM793TR melanoma cell actin organization demonstrating reduced, normal or increased actin stress fibers. Bar, 50  $\mu\text{m}$ . *B-C*, Doxycycline-inducible WM115 melanoma cells expressing Rnd3<sup>#2</sup> shRNA cultured for 72 hours  $\pm$  0.1  $\mu\text{g/ml}$  dox. *B*, Cell lysates were analyzed by western blotting for Rnd3 and  $\beta$ -actin. *C*, F-actin organization visualized using TRITC-phalloidin. Bar, 50  $\mu\text{m}$ . *D*, Serum-containing medium is required for Rnd3 knockdown-induced stress fiber formation. WM793TR-Rnd3<sup>#2</sup> shRNA cells were plated on glass coverslips for 24 hours in complete medium. Afterwards, the cell culture medium was replaced with either complete medium  $\pm$  dox or serum-free medium containing 0.5 % BSA  $\pm$  dox for 72 hours. Cells were then fixed and processed to visualize F-actin organization using TRITC-phalloidin. Bar, 50  $\mu\text{m}$ .

**Supplementary Figure 2.** Depletion of endogenous Rnd3 alters melanoma focal adhesions. *A*, Vinculin localization in the WM793TR Ctl, Rnd3<sup>#1</sup> and Rnd3<sup>#2</sup> shRNA melanoma cells. Cells cultured  $\pm$  dox for 72 hours were fixed and stained with anti-vinculin antibody. Vinculin staining was visualized using Alexa-Fluor 488 conjugated anti-mouse secondary antibodies. Bar, 50  $\mu\text{m}$ .

**Supplementary Figure 3.** Rnd3 expression does not alter cell surface integrin expression or adhesion to collagen gel. Melanoma cells were cultured in complete medium  $\pm$  0.1  $\mu\text{g/ml}$  dox for 72 hours to induce expression of Ctl, Rnd3<sup>#1</sup> or Rnd3<sup>#2</sup> shRNA. *A*, Cell surface expression of

integrins  $\alpha v\beta 3$ ,  $\beta 1$ ,  $\alpha 1$  and  $\alpha 2$  was analyzed by flow cytometry. Depicted are representative traces from one of two-three independent experiments. *B*, Time course of cell adhesion to collagen gel. Equal numbers of cells were treated  $\pm$  dox for 72 hours and then replated onto bovine type I collagen gel for the indicated times (5, 15, 30, 60, 90 min). Cell layers were washed, fixed and counted. Graphed is the mean  $\pm$  SD from one experiment performed in triplicate. Two independent experiments were performed with comparable results.

**Supplementary Figure 4.** Depletion of endogenous Rnd3 does not alter ERK1/2 and AKT phosphorylation or cyclin D1 expression in melanoma cells. Dox-inducible WM793 melanoma cells expressing either Ctl, Rnd3<sup>#1</sup> or Rnd3<sup>#2</sup> shRNA were cultured for 72 hours  $\pm$  dox. Cell lysates were generated and analyzed by western blotting for *A*, phospho ERK1/2 and total ERK2 levels; *B*, phospho(pS473) AKT and total AKT levels; and *C*, cyclin D1 and ERK2 levels.

**Supplementary Figure 5.** Diagram outlining the role of Rnd3 in the regulation of signaling pathways and melanoma cell migration. High Rnd3 expression in invasive melanoma provides a negative feedback loop to constrain RhoA-ROCK signaling via p190RhoGAP, and possibly additional effectors. When expression of Rnd3 is low, elevated RhoA-ROCK signaling supports the phosphorylation of myosin light chain and cofilin, and promotes actin stress fiber formation.

**Supplementary Figure 6.** Rnd3 expression is p53 independent in WM793 melanoma cells. WM793 cells were transfected with siRNA duplexes targeting Ctl, B-RAF or p53 for 72 hours. Ctl, B-RAF<sup>#1</sup> and p53 siRNAs have been previously published (1, 2). Cell lysates were subjected to Western blot analysis using antibodies for B-RAF, p53, Rnd3 and ERK2.

## References

1. Klein RM, Spofford LS, Abel EV, Ortiz A, Aplin AE. B-RAF regulation of Rnd3 participates in actin cytoskeletal and focal adhesion organization. *Mol Biol Cell* 2008;19:498-508.
2. Hu R, Aplin AE. Skp2 regulates G2/M progression in a p53-dependent manner. *Mol Biol Cell* 2008;19:4602-10.

**A**

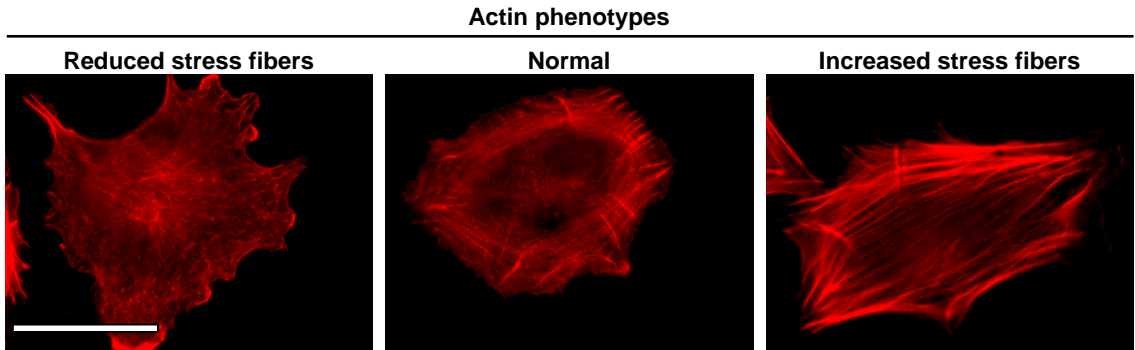

**B**

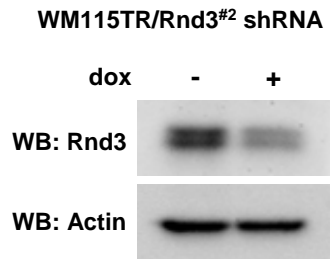

**C**

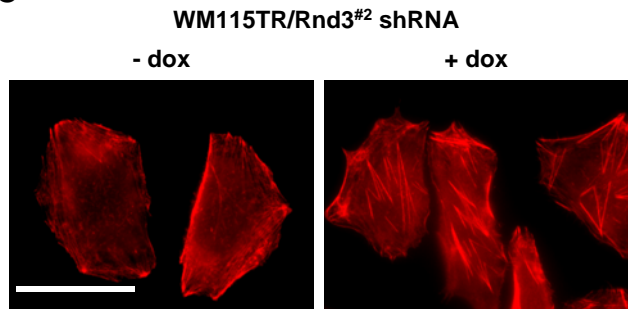

**D**

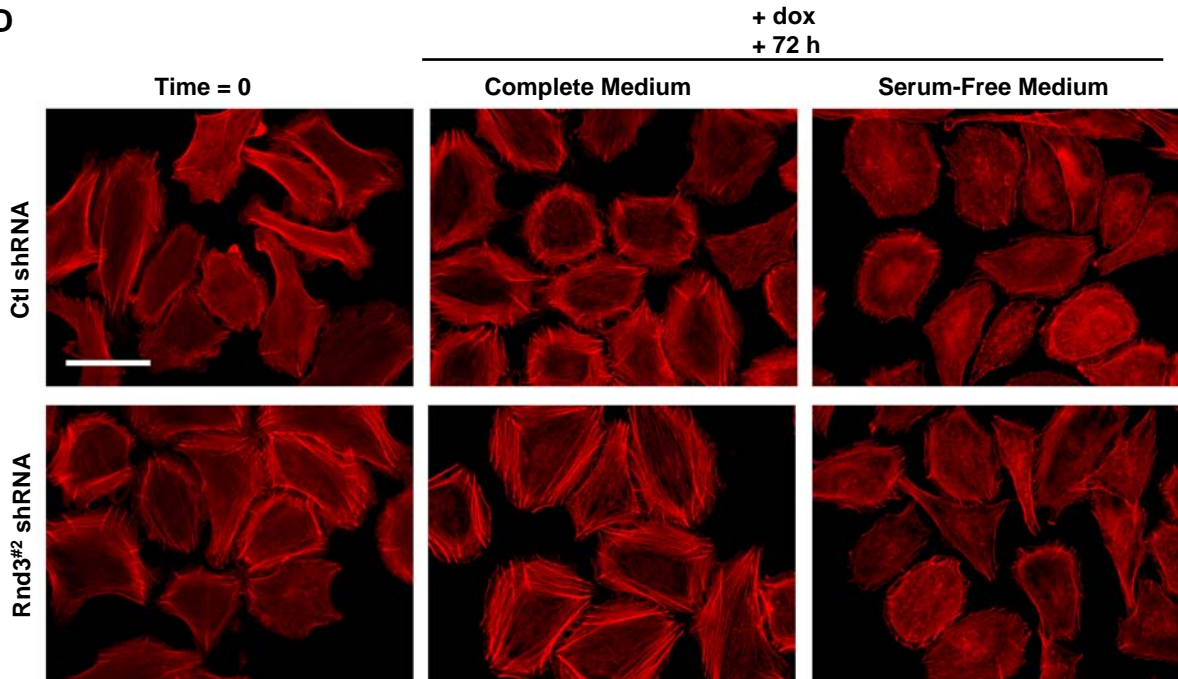

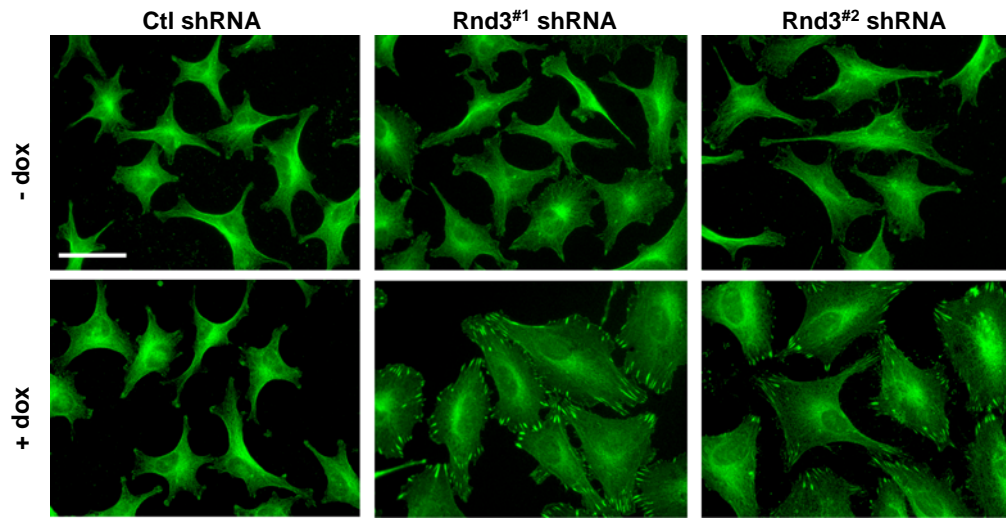

**A**

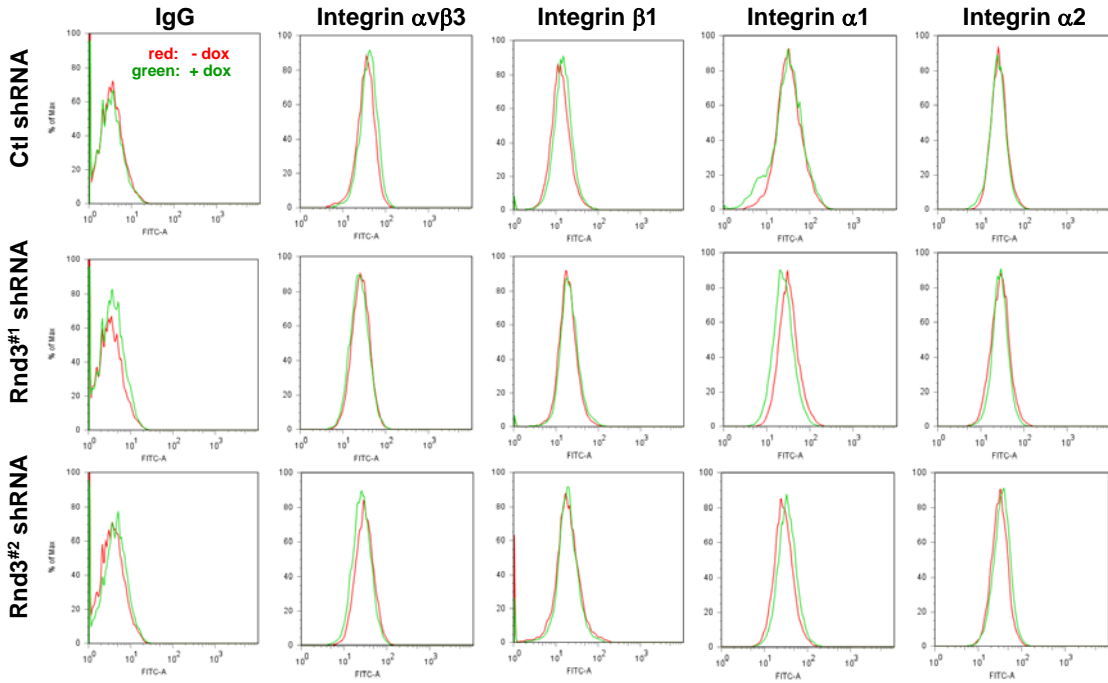

**B**

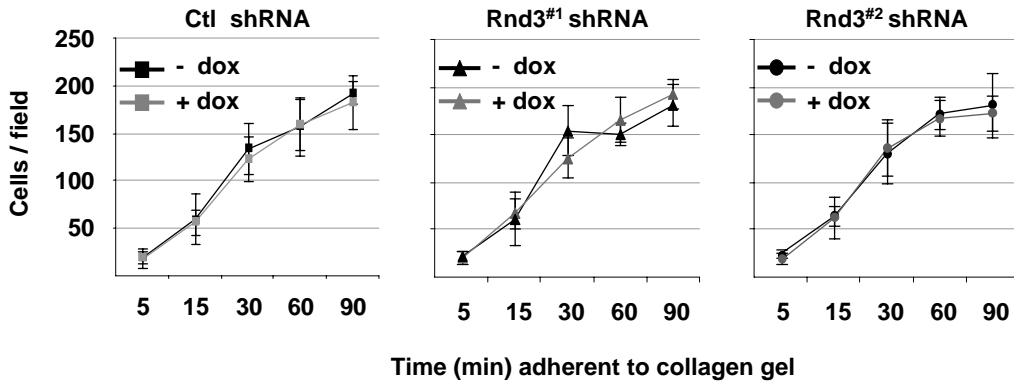



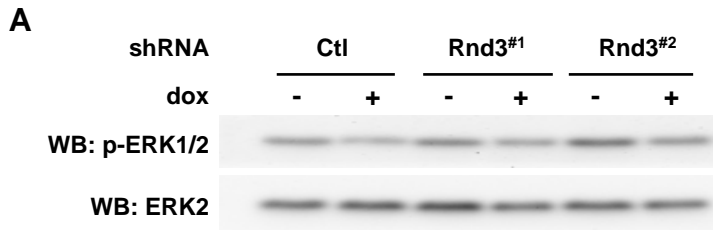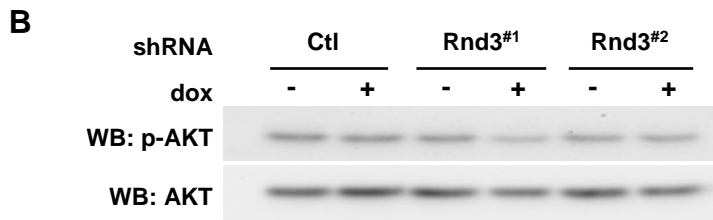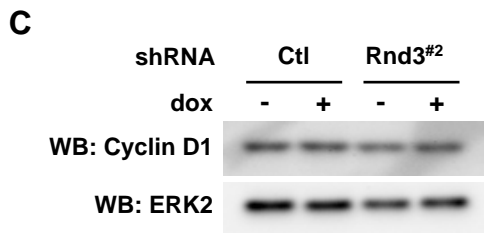

## High Rnd3 Expression

Suppressed Actin Stress Fibers – 2D

Efficient Cell Migration – 3D

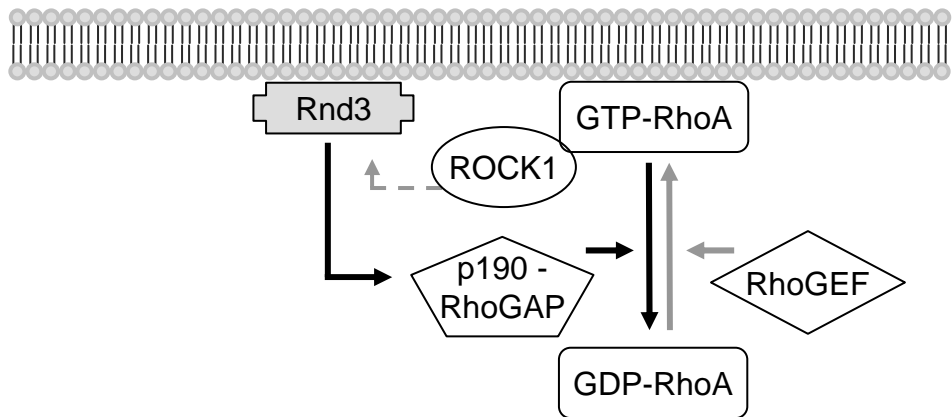

## Low Rnd3 Expression

Increased Actin Stress Fibers – 2D

Reduced Cell Migration – 3D

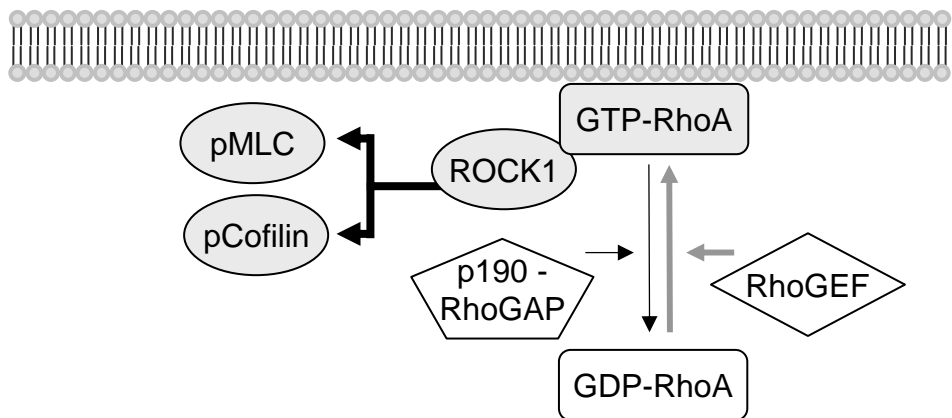

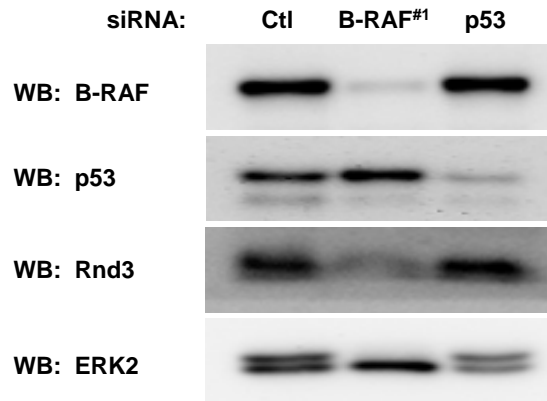

Supplement: NIHMS90605-supplement-Figs_S1-S6.pdf [file NIHMS90605-supplement-Figs_S1-S6.pdf]
